# Supplementary material for: Germination-Arrest Bacillus subtilis Spores as An Oral Delivery Vehicle of Grass Carp Reovirus (GCRV) Vp7 Antigen Augment Protective Immunity in Grass Carp (Ctenopharyngodon idella)
Source: PubMed Central journal article supplement (PMC7696455; doi:10.3390/genes11111351), 2020-11-14
Supplement: genes-11-01351-s001.pdf [file genes-11-01351-s001.pdf]

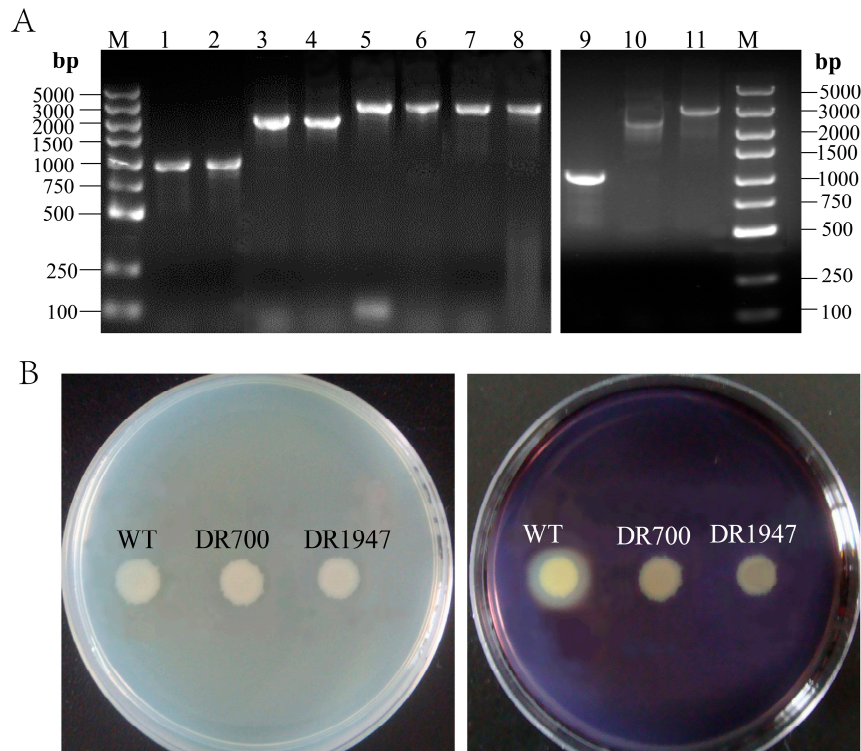

**Figure S1** Identification of the recombinant *B.subtilis*. (A) PCR identification of the strains WT, DR1956/1985, DR2000/1985 and DR2000/2020 using the primers sleB-1/sleB-2 (Lanes 1, 3, 5, 7) and the primers cwIJ-1/cwIJ-2(Lanes 2, 4, 6, 8), as well as the strain DR700 and DR1947 using the primer amyE-1/amyE-2 (lanes 10 and 11). (B) Amylase activity analysis of the strain DR700 and DR1947 on the starch plate stained with iodine solution.

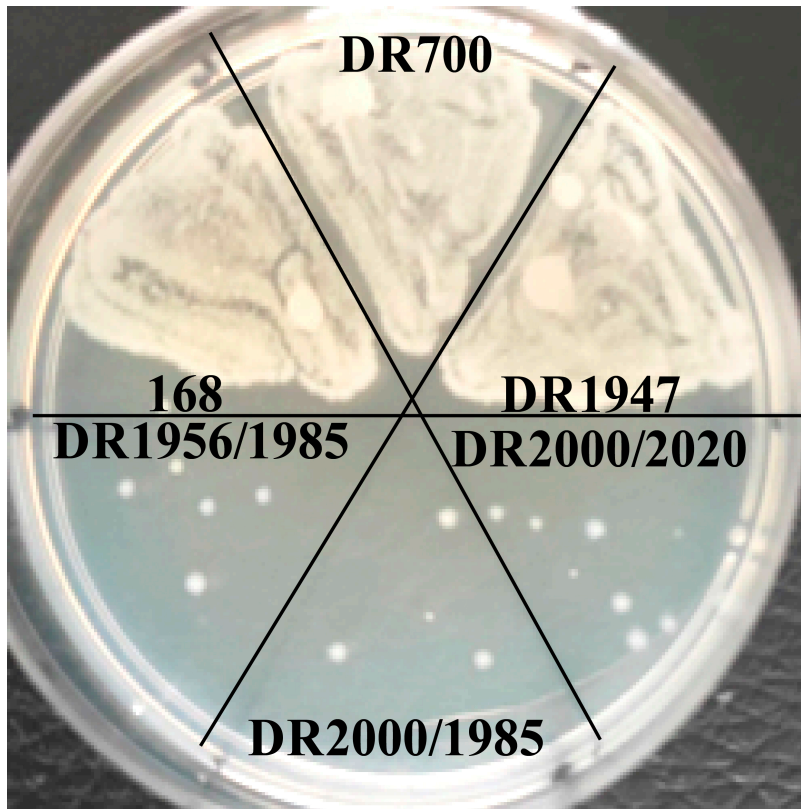

**Figure S2** Spore germination of recombinant strains and wild-type strain 168 on LB plates.

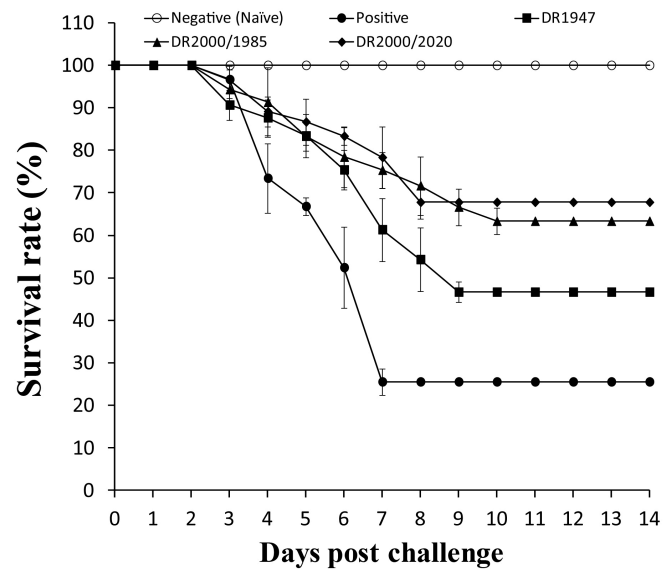

**Figure S3** Cumulative survival rate of grass carp after GCRV challenge. Data are means for three assays and presented as the means  $\pm$  SD (n=30).

**Table S1** The primers used in this study

| Primer            | Sequence (5'-3')*                                              | Accession number | Restriction site |
|-------------------|----------------------------------------------------------------|------------------|------------------|
| pUC18-R1          | GAGAGAGG <u>AGATCT</u> GCGTAATAGCGAAGAGGCC                     |                  | BglII            |
| pUC18-R2          | GAGAGAGG <u>AGATCT</u> CGGCGGTTTGCCTATTGGGCG                   |                  | BglII            |
| cwIJ-1            | GAGAGAGG <u>AGATCT</u> CAAAGCCCAGACCAAGCACCAG                  | BSU02600         | BglII            |
| cwIJ-2            | GAGAGAGG <u>AGATCT</u> CCCATAACATCCAGCAAACCG                   |                  | BglII            |
| cwIJ-R1           | GAGAGAGG <u>ACTG</u> CAGTGAGCAATTCGCCCCGAGCC                   |                  | PstI             |
| cwIJ-R2           | GAGAGAGGAG <u>AGCTC</u> GCGAGATAGCGAGCGTGCCC                   |                  | SacI             |
| sleB-1            | GAGAGAGG <u>AGATCT</u> GAGGCTTGAAAAGATGAAGTCC                  | BSU22930         | BglII            |
| sleB-2            | GAGAGAGG <u>AGATCT</u> CCTGGTGTCTTTGTATCCCC                    |                  | BglII            |
| sleB-R1           | GAGAGAGG <u>ACTG</u> CAGGCATTTCGCTTTAGGCTTCTGCG                |                  | PstI             |
| selB-R2           | GAGAGAGGAG <u>AGCTC</u> AACAGGATGCGGTAGCAGCG                   |                  | SacI             |
| cotB-1            | AGTTTACATAATATATATATTCTAGGAAGTCGGATTAGGC<br>CGTTTGTCTC         | BSU36050         |                  |
| cotB-2            | <u>CATATG</u> GGATGATTGATCATCTGAAGAT                           |                  | NdeI             |
| cotC-1            | CCGGAGTTTACATAATATATATATTCTAGGAAGTCCGGTT<br>CAAAATAAATGCATTCCC | BSU17700         |                  |
| cotC-2            | <u>CATATG</u> GTGTTTTTTATGCTTTTTATACTCTACAAC                   |                  | NdeI             |
| emr-1             | GACTTCCTAGAATATATATTATGTAAACTCGAAAAGTG<br>CCACCTGACGTC         |                  |                  |
| emr-2             | AGTTTACATAATATATATATTCTAGGAAGTAGCTCCTTGG<br>AAGCTGTCAG         |                  |                  |
| npt-1             | GGACTTCCTAGAATATATATATTATGTAAACTCCGTTAAT<br>GCGCCATGACAG       |                  |                  |
| npt-2             | GGAGTTTACATAATATATATATTCTAGGAAGTGACGAAAC<br>TGCAAAATATCC       |                  |                  |
| vp7-1             | GGAGAGAC <u>ATATG</u> CCACTTCACATGATTCCGC                      |                  | NdeI             |
| vp7-2             | GGAGAGAG <u>AGCTC</u> TGATGGTTCCACGTGCAAGTCGAG                 | AF403396         | SacI             |
| IL-11F            | GCTGAGGCATCGGAGGCACAT                                          | DQ417927         |                  |
| IL-11R            | TTGGGTCTCGCACCATTTTCTC                                         |                  |                  |
| $\beta$ -actin -1 | GATGATGAAATTGCCGCACTG                                          | M25013           |                  |
| $\beta$ -actin -2 | ACCGACCATGACGCCCTGATGT                                         |                  |                  |
| TNF- $\alpha$ -1  | TGTGCCGCCGTGTCTGCTTCACGCT                                      | EU047718         |                  |
| TNF- $\alpha$ -2  | GATGAGGAAAGACACCTGGCTGTAGA                                     |                  |                  |
| IL-1 $\beta$ -1   | GGAGAATGTGATCGAAGAGCGT                                         | EU047716         |                  |
| IL-1 $\beta$ -2   | GCTGATAAACCATCCGGGA                                            |                  |                  |
| MHC II-1          | TACTACCAGATTCACCTCGG                                           | GU441573         |                  |
| MHC II-2          | CGGGTTCCAGTCAAAGAT                                             |                  |                  |
| CD4L-1            | ATGTGTCCAGGTGTCATAGT                                           | KX033448         |                  |
| CD4L-2            | GGAATTTTGACTGTATAGGAT                                          |                  |                  |

\*Underlined are the recognition sites for the restriction enzymes indicated in the table.
